# Supplementary material for: MRI evidence of structural changes in the sacroiliac joints of patients with non-radiographic axial spondyloarthritis even in the absence of MRI inflammation
Source: Springer Nature journal article supplement (doi:10.1186/s13075-017-1342-9), 2017-06-06

## Additional file 2

Lesions seen on T1 weighted spin echo MRI: subchondral fat metaplasia (a), backfill (b), erosion (c), and ankylosis (d)

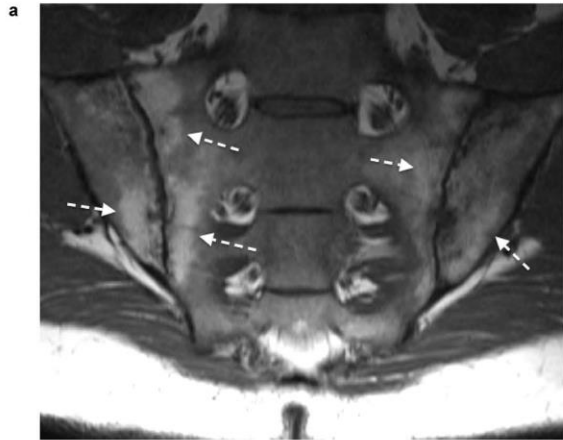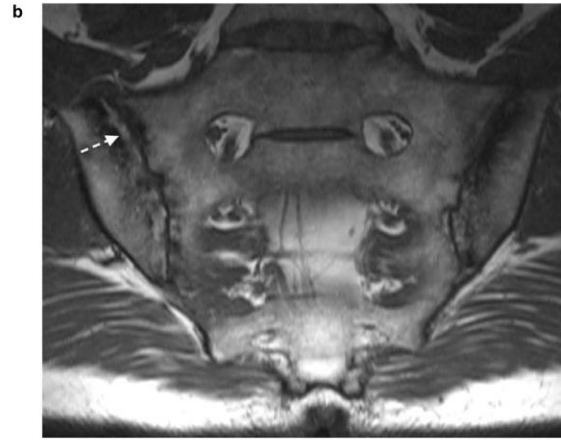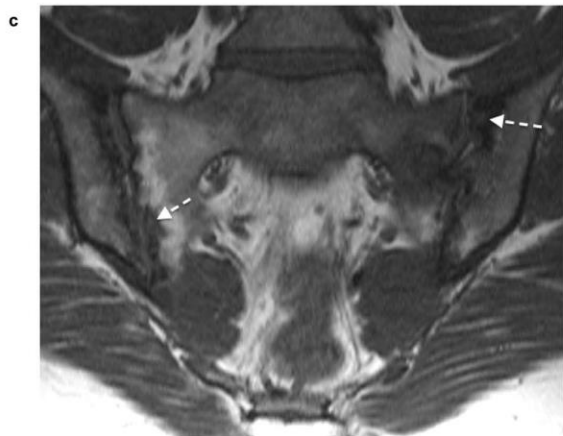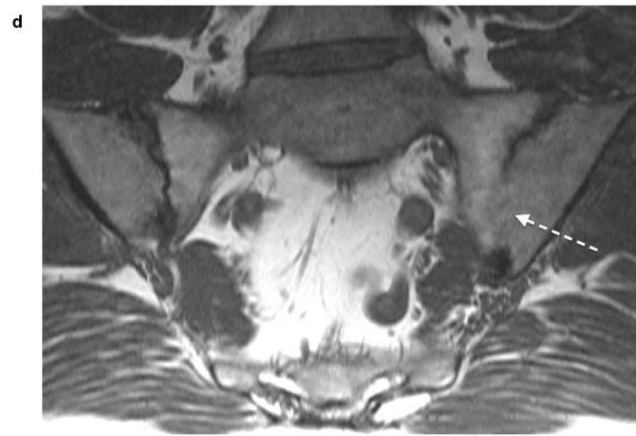

Supplement: MOESM2 [file 12342590]
